# Supplementary material for: Synergistic modulation of ABC transporter-mediated multidrug resistance by Kalanchoe laciniata (L.) DC. phytochemicals: integrative phytochemical profiling, network pharmacology, and molecular docking insights
Source: Royal Society of Chemistry journal article supplement (doi:10.1039/d5ra09649a), 2026-01-01
Supplement: d5ra09649a1.pdf [file d5ra09649a1.pdf]

### Preliminary qualitative analysis of Metabolites

All the solvent-based extracts were subjected to preliminary qualitative phytochemical screening. The results indicate that alkaloids, saponins, tannins, flavonoids, phenols, and phytosterols were found to be higher in methanolic extract compared to other extracts. Anthraquinone and coumarins were absent in all the extracts Table S1.

**Table S1. Qualitative analysis of *Kalanchoe laciniata*.**

| S.No | Compounds         | Fresh Powder |
|------|-------------------|--------------|
| 1.   | Carbohydrates     | ++           |
| 2.   | Protein           | +            |
| 3.   | Saponin           | +++          |
| 4.   | Phenolics         | +++          |
| 5.   | Flavonoids        | +            |
| 6.   | Alkaloids         | +            |
| 7.   | Tannins           | +            |
| 8.   | Phytosterols      | +            |
| 9.   | Glycosides        | +            |
| 10.  | Amino Acids       | +++          |
| 11.  | Gums and Mucilage | -            |

+++ : highly present, ++ : moderately present, + : Low; (+) < (++) < (+++): Based on the intensity of the characteristics colour observed.

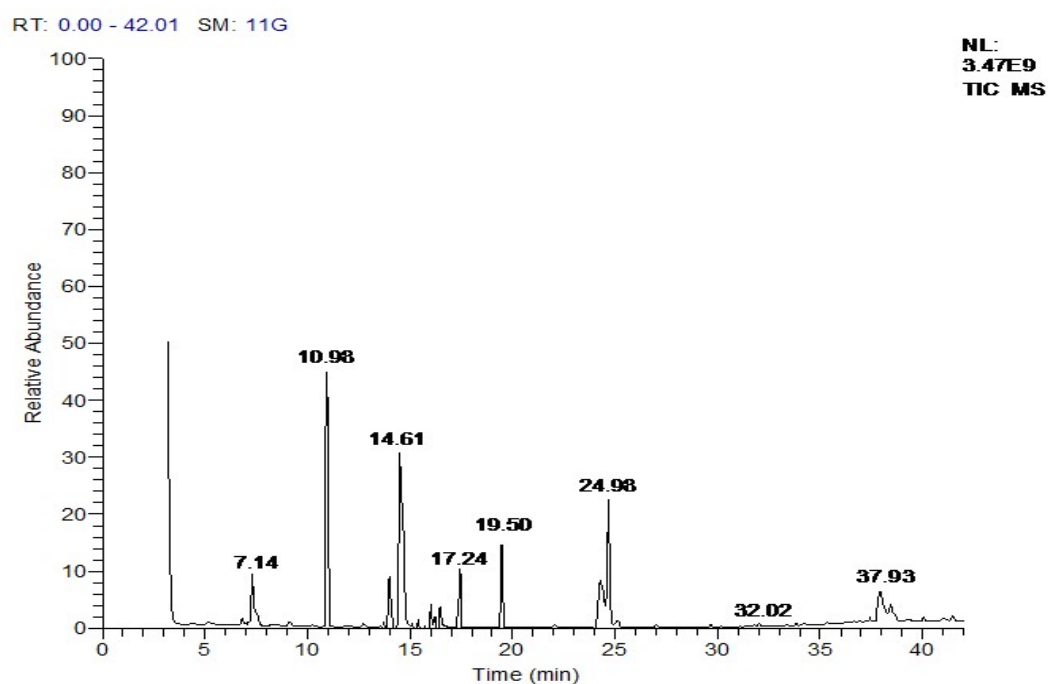

**Fig. S1.** GC-MS analysis chromatogram of *K. laciniata* methanolic extract

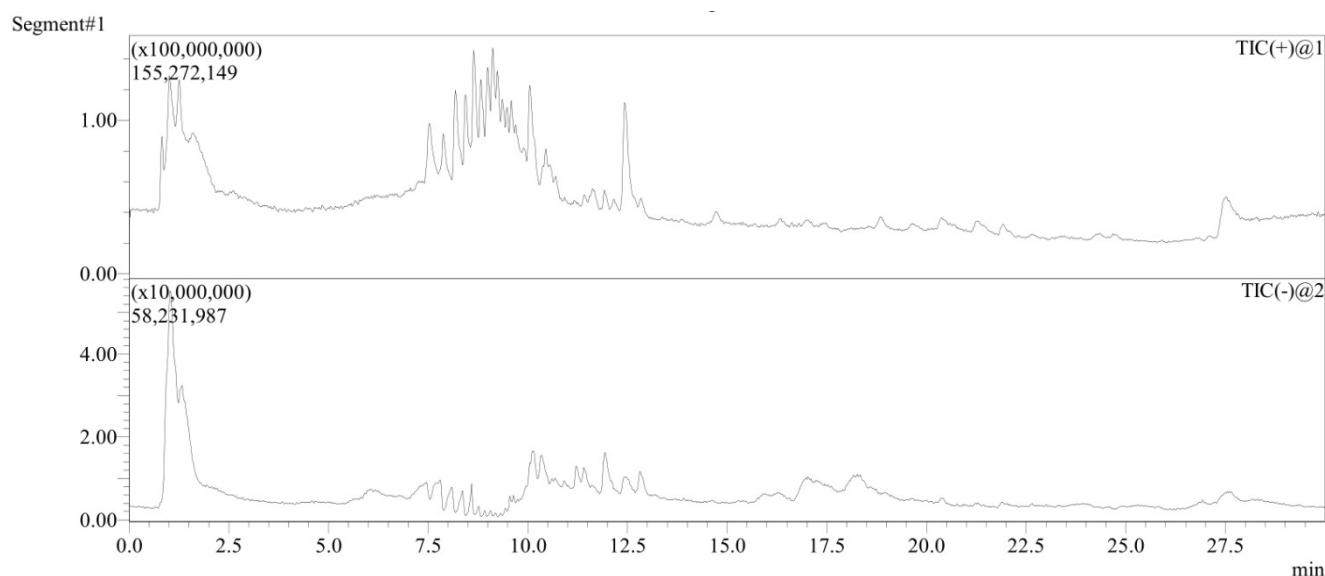

**Fig. S2.** LC-MS analysis chromatogram of *K. laciniata* methanolic extract

## Table. S2. Characteristics of compound

Characteristics of selected bioactive compounds identified from *Kalanchoe laciniata* and shortlisted from the compound–target interaction network. The table summarizes the compound name, molecular formula, two-dimensional (2D) chemical structure, and predicted network pharmacology parameters including closeness centrality (CC), betweenness

centrality (BC), and average shortest path length (ASPL), derived from the compound–target network analysis. These metrics reflect the relative importance and connectivity of each compound within the interaction network and were used to prioritize key compounds for further in silico evaluation.

| Compound Name                                        | Molecular formula                                          | 2D Structure                                                                         | CC   | BC   | ASPL |
|------------------------------------------------------|------------------------------------------------------------|--------------------------------------------------------------------------------------|------|------|------|
| Kalanchoside C                                       | <a href="#">C<sub>30</sub>H<sub>42</sub>O<sub>9</sub></a>  | 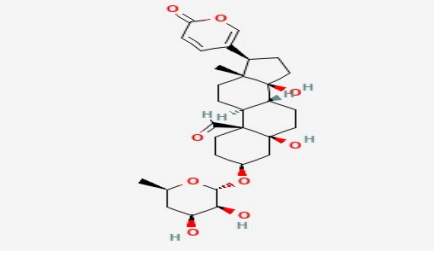   | 0.39 | 0.14 | 2.54 |
| Kalanchoside B                                       | <a href="#">C<sub>30</sub>H<sub>42</sub>O<sub>10</sub></a> |   | 0.39 | 0.14 | 2.54 |
| Oleanolic acid<br>beta-D-<br>glucopyranosyl<br>ester | <a href="#">C<sub>36</sub>H<sub>58</sub>O<sub>8</sub></a>  |  | 0.39 | 0.20 | 2.54 |
| Patuletin                                            | <a href="#">C<sub>16</sub>H<sub>12</sub>O<sub>8</sub></a>  |  | 0.39 | 0.09 | 2.54 |
| Stigmasterol                                         | <a href="#">C<sub>29</sub>H<sub>48</sub>O</a>              |  | 0.39 | 0.23 | 2.54 |

|                                                                 |                                                            |                                                                                      |      |       |      |
|-----------------------------------------------------------------|------------------------------------------------------------|--------------------------------------------------------------------------------------|------|-------|------|
| kaempferol 3-O-(2'-O-D-glucopyranosyl)-beta-D-galactopyranoside | <a href="#">C<sub>27</sub>H<sub>29</sub>O<sub>16</sub></a> | 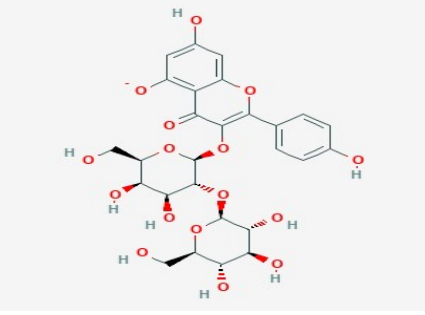   | 0.39 | 0.039 | 2.54 |
| Kaempferol-3-O-glucoside-3''-rhamnoside                         | <a href="#">C<sub>27</sub>H<sub>30</sub>O<sub>15</sub></a> |    | 0.39 | 0.04  | 2.54 |
| Kaempferol 3-(3'',4''-diacetylrrhamnoside)                      | <a href="#">C<sub>25</sub>H<sub>24</sub>O<sub>12</sub></a> |   | 0.39 | 0.13  | 2.54 |
| Quercetin 3-(2-glucosylrhamnoside)                              | <a href="#">C<sub>27</sub>H<sub>30</sub>O<sub>16</sub></a> |  | 0.39 | 0.044 | 2.54 |
| Cinnamic acid                                                   | <a href="#">C<sub>9</sub>H<sub>8</sub>O<sub>2</sub></a>    |  | 0.39 | 0.17  | 2.54 |
| Miquelianin                                                     | <a href="#">C<sub>21</sub>H<sub>18</sub>O<sub>13</sub></a> |  | 0.39 | 0.04  | 2.54 |

|                                                                                         |                                                            |                                                                                     |       |       |      |
|-----------------------------------------------------------------------------------------|------------------------------------------------------------|-------------------------------------------------------------------------------------|-------|-------|------|
| Rutin trihydrate                                                                        | <a href="#">C<sub>27</sub>H<sub>36</sub>O<sub>19</sub></a> |   | 0.39  | 0.035 | 2.54 |
| Quercetin 3-O-<br>.beta.-D-<br>xylopyranosyl-(1-<br>->2)-.beta.-D-<br>galactopyranoside | <a href="#">C<sub>26</sub>H<sub>28</sub>O<sub>16</sub></a> |   | 0.390 | 0.044 | 2.54 |
| Kalambroside-A                                                                          | <a href="#">C<sub>32</sub>H<sub>36</sub>O<sub>18</sub></a> |  | 2.54  | 0.17  | 0.39 |

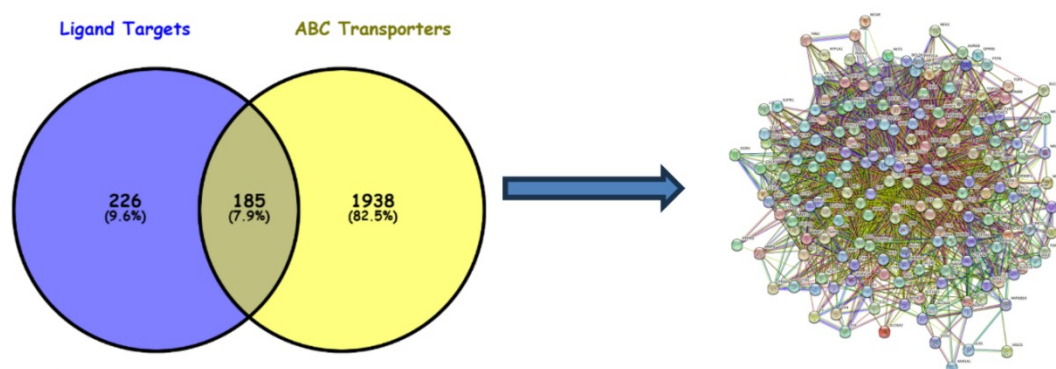

**Fig. S3.** Common genes String analysis displayed along with Venn diagram of ligand targets and ABC transporters, used to identify common genes.

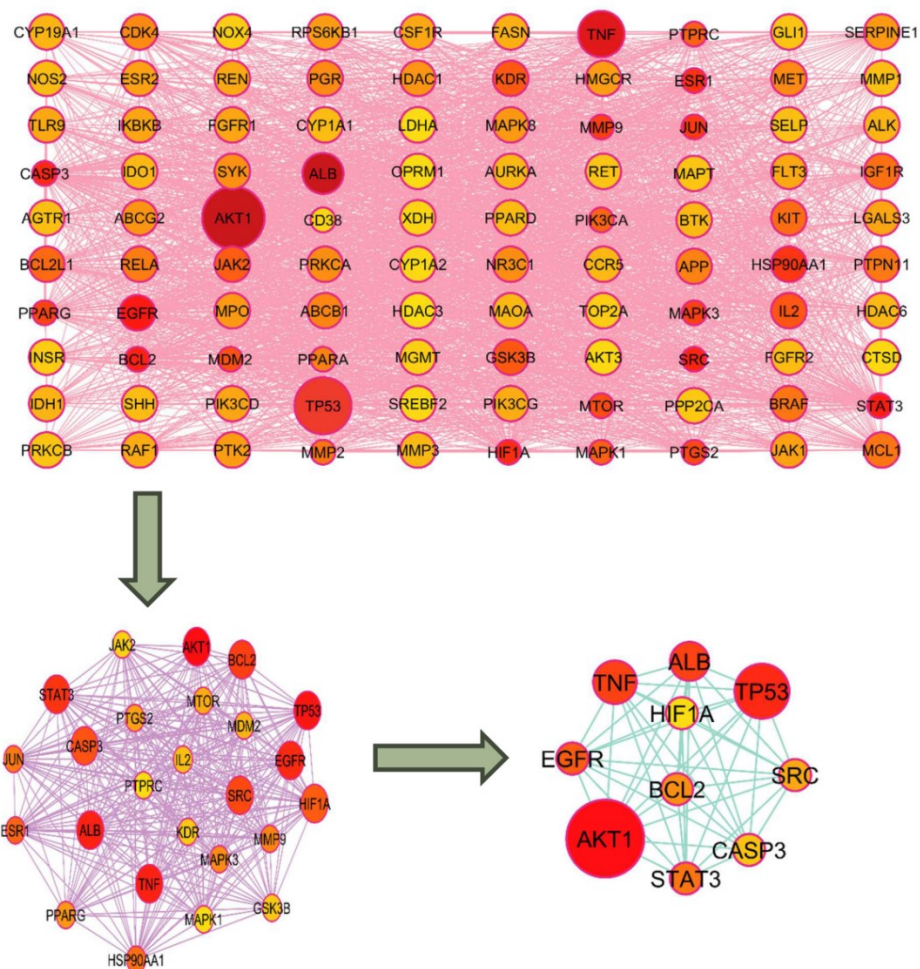

**Fig. S4.** Protein-protein interaction network of Top 100 common targets of *K. laciniata* and ABC transporters the larger the node indicates the dark colour, the larger its degree value in the network, and the greater its importance within the network.

**Table S3. Network Topology of ABC Transporter-Associated Targets Modulated by KLM**

| Target Name | Degree | CC    | BC   | ASPL |
|-------------|--------|-------|------|------|
| AKT1        | 119    | 0.045 | 0.73 | 1.35 |
| TP53        | 116    | 0.040 | 0.72 | 1.37 |
| TNF         | 113    | 0.051 | 0.72 | 1.38 |
| ALB         | 113    | 0.076 | 0.72 | 1.38 |
| EGFR        | 111    | 0.044 | 0.71 | 1.40 |

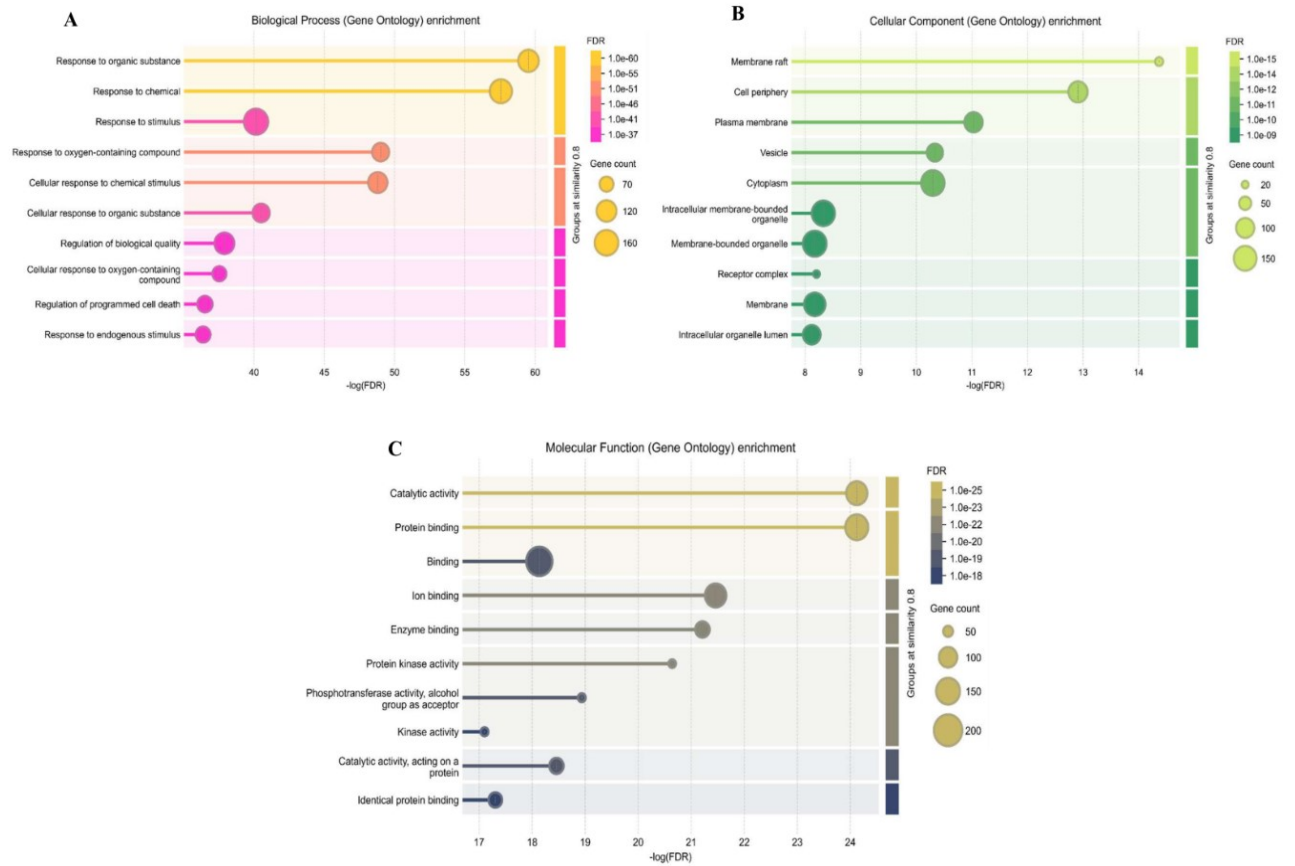

**Fig. S5(A-C).** **A.** shows the Biological Processes enriched, **B** shows the cellular components enriched, and **C** shows the Molecular Functions enriched by the common genes.

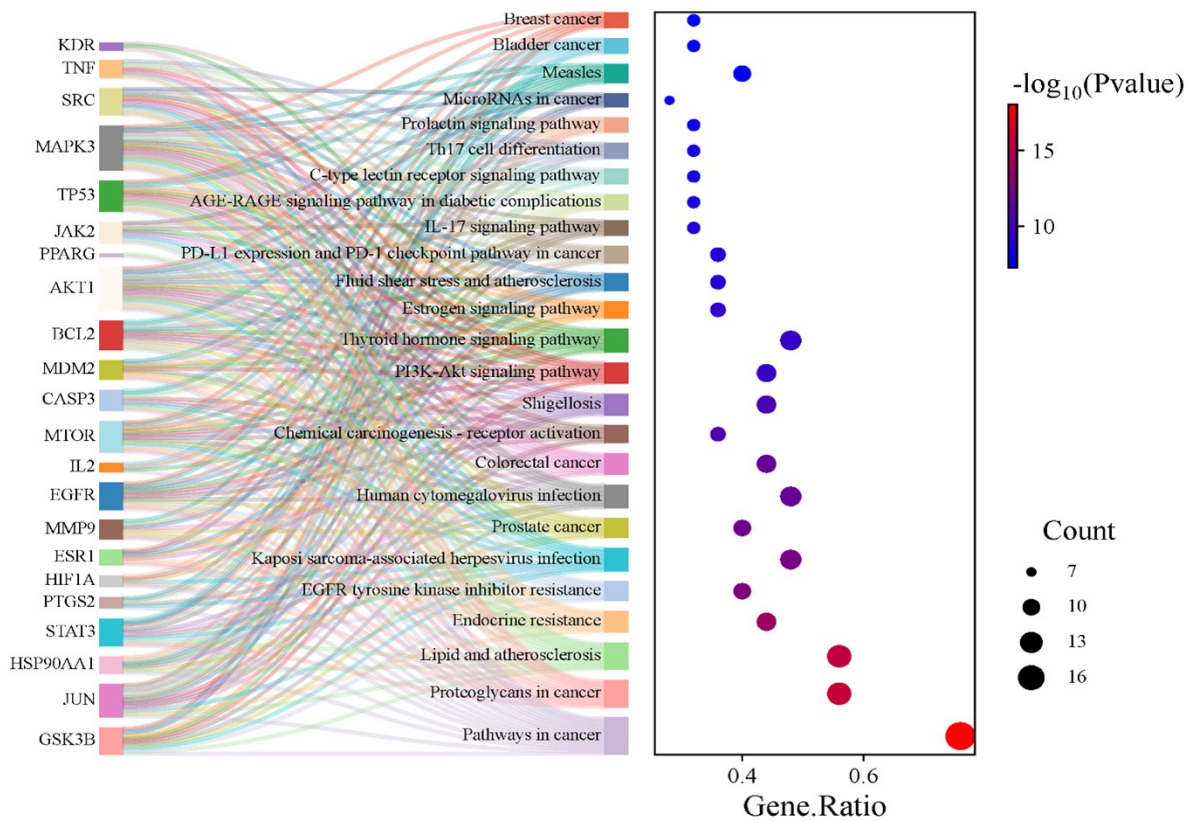

Fig S6. Bubble graph of top 20 signalling pathways

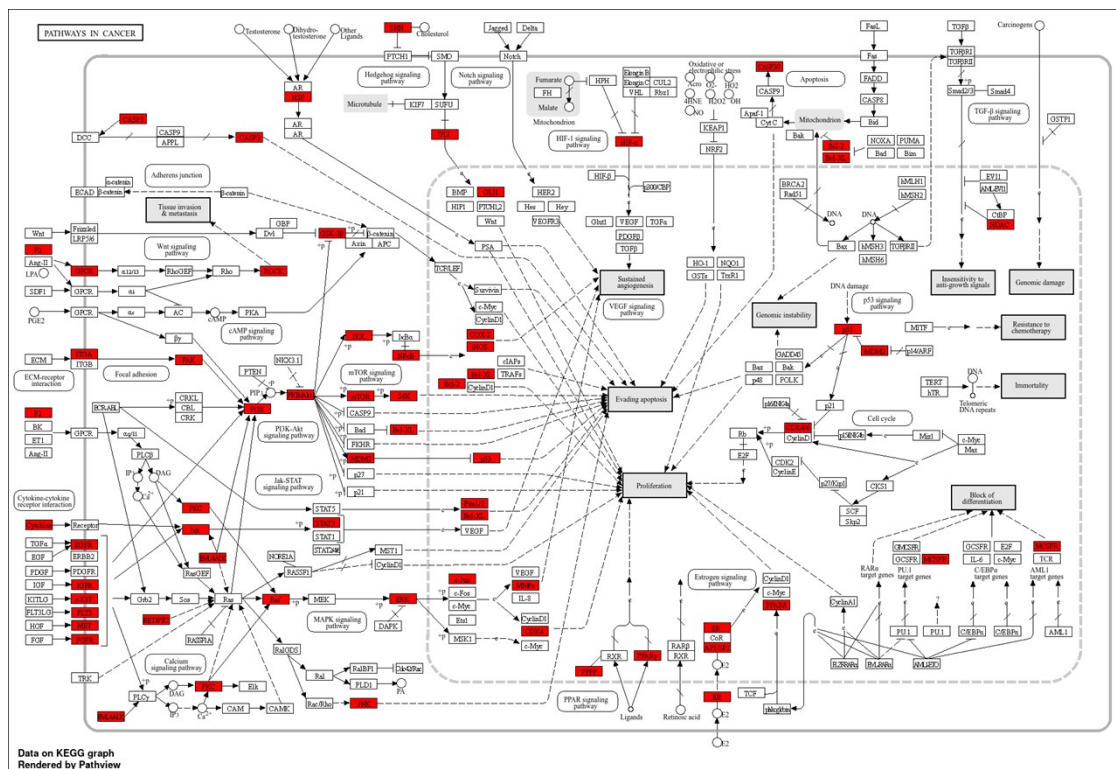

Fig S7. KEGG graph of common genes involved in different pathways in cancer.



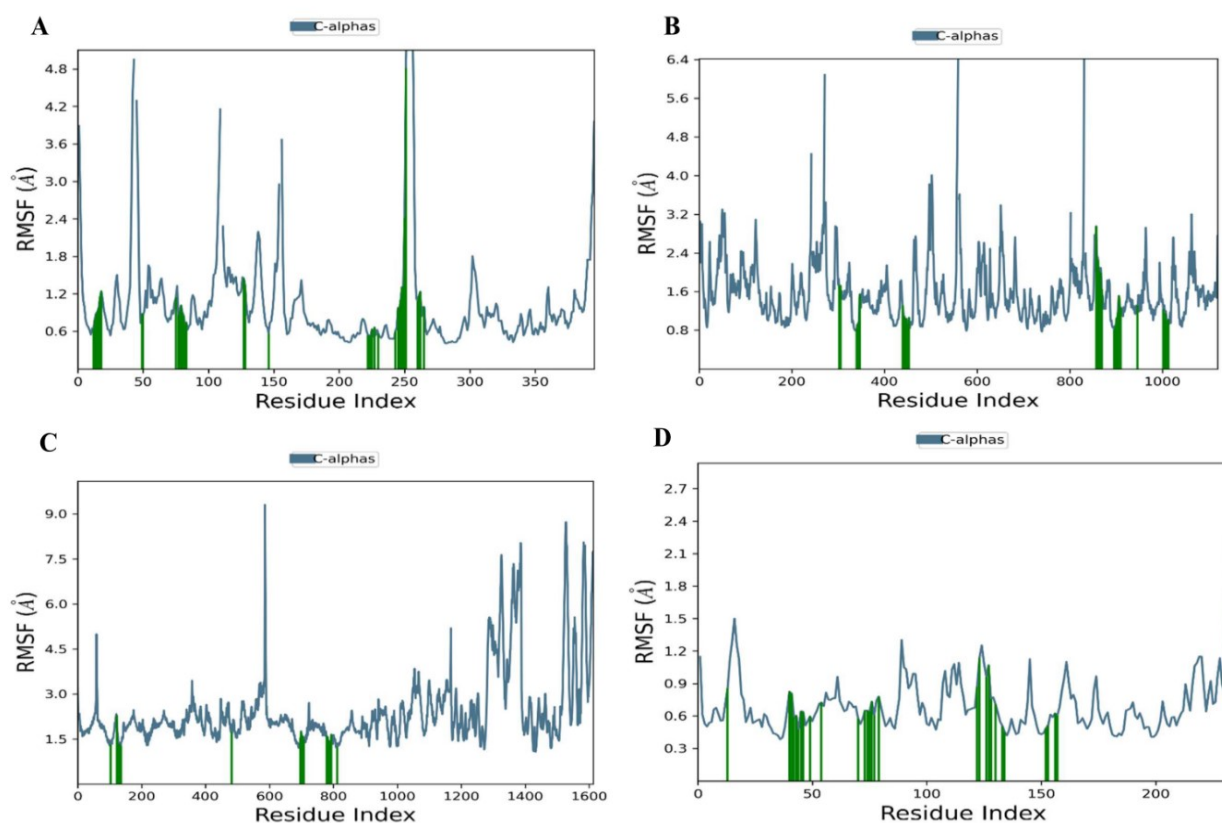

**Fig. S9 (A-C)** RMSF plot of different protein-ligand complexes. (A - AKT1 & Quercetin 3-O-beta-D-xylopyranosyl-(1--2)-beta-D-galactopyranoside), (B - BCRP & Rutin), (C - P-gp & Quercetin 3-O-beta-D-xylopyranosyl-(1--2)-beta-D-galactopyranoside), and (D - MRP1 & Quercetin 3-(2-glucosylrhamnoside))

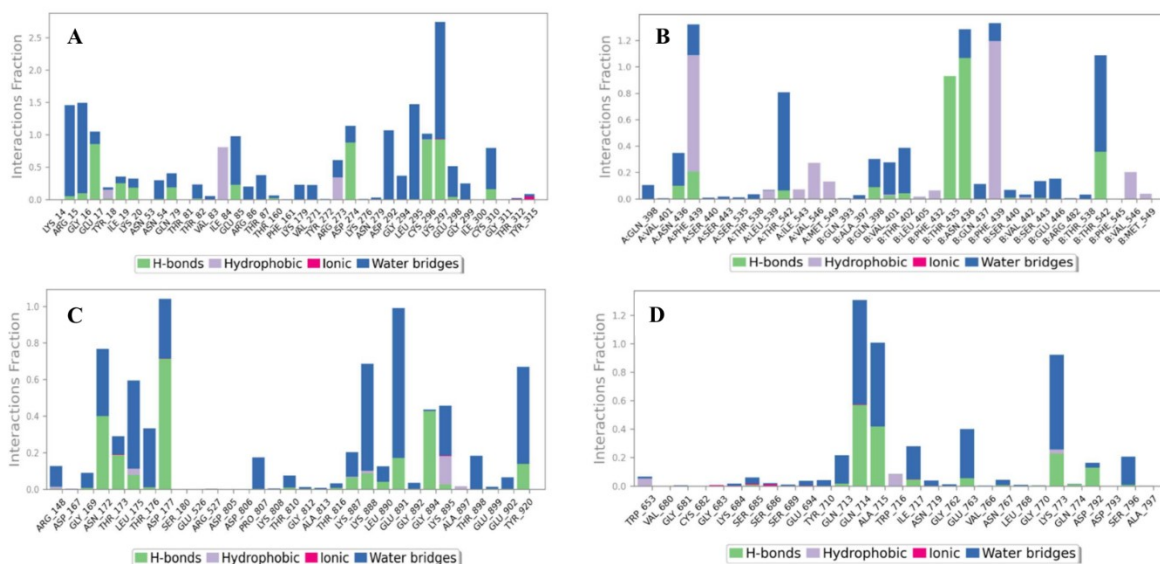

**Fig. S10 (A-C)** Protein-Ligand contact types all four protein-ligand complexes. (A - AKT1 & Quercetin 3-O-beta-D-xylopyranosyl-(1--2)-beta-D-galactopyranoside), (B - BCRP & Rutin), (C - P-gp & Quercetin 3-O-beta-D-xylopyranosyl-(1--2)-beta-D-galactopyranoside), and (D - MRP1 & Quercetin 3-(2-glucosylrhamnoside))

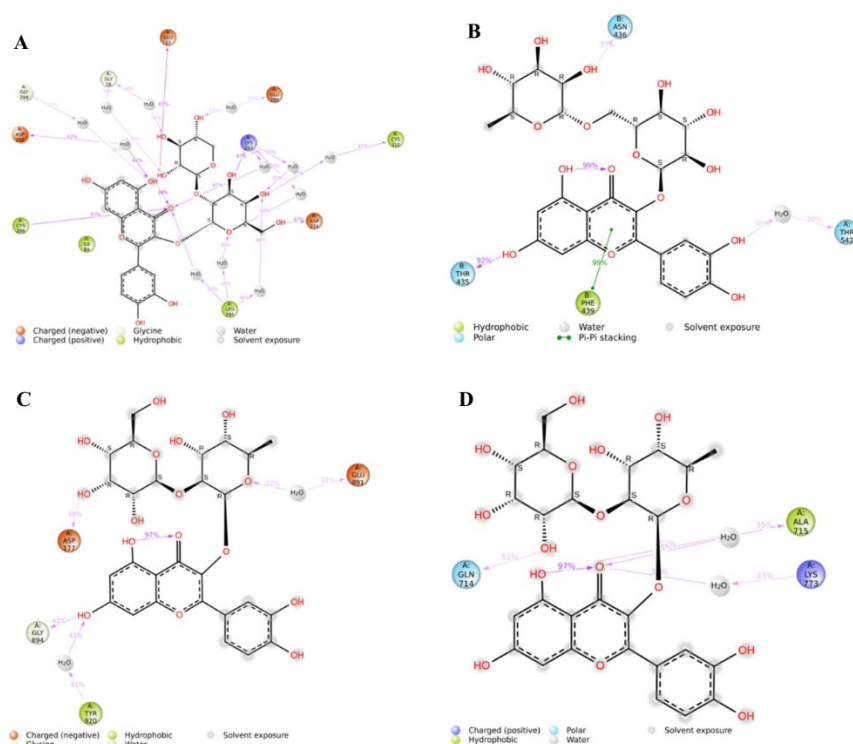

**Fig. S11 (A-D)** 2D protein ligand interaction diagrams of different protein-ligand complexes. (A - AKT1 & Quercetin 3-O-beta-D-xylopyranosyl-(1-2)-beta-D-galactopyranoside), (B - BCRP & Rutin), (C - P-gp & Quercetin 3-O-beta-D-xylopyranosyl-(1-2)-beta-D-galactopyranoside), and (D - MRP1 & Quercetin 3-(2-glucosylrhamnoside)).

### Effects of *Kalanchoe laciniata* extract on the viability of the RIN-5F cell line

The cytotoxic potential of the methanolic leaf extract of *Kalanchoe laciniata* (KLM) was assessed in normal pancreatic  $\beta$ -cell line RIN-5F using the MTT assay to evaluate its selectivity toward cancer cells. Cells were exposed to varying concentrations of the extract (100–600  $\mu\text{g mL}^{-1}$ ) for 24 hours, and cell viability was determined spectrophotometrically. The results revealed a concentration-dependent reduction in cell viability, with percentage inhibitions of 37.43%, 39.97%, 61.15%, 66.32%, and 87.98% at 100, 200, 300, 500, and 600  $\mu\text{g mL}^{-1}$ , respectively. The  $\text{IC}_{50}$  value of the extract against RIN-5F cells was calculated to be 242.17  $\mu\text{g mL}^{-1}$ , indicating moderate cytotoxicity in normal cells. When compared to the  $\text{IC}_{50}$  value obtained for MDA-MB-231 breast cancer cells (60.55  $\mu\text{g mL}^{-1}$ ), the substantially higher  $\text{IC}_{50}$  in RIN-5F cells suggests a favorable degree of selectivity and safety of the extract toward normal cells. While RIN-5F cells were used to assess non-specific cytotoxicity, future investigations incorporating normal mammary epithelial models such as MCF-10A will be necessary to confirm breast tissue-specific selectivity.

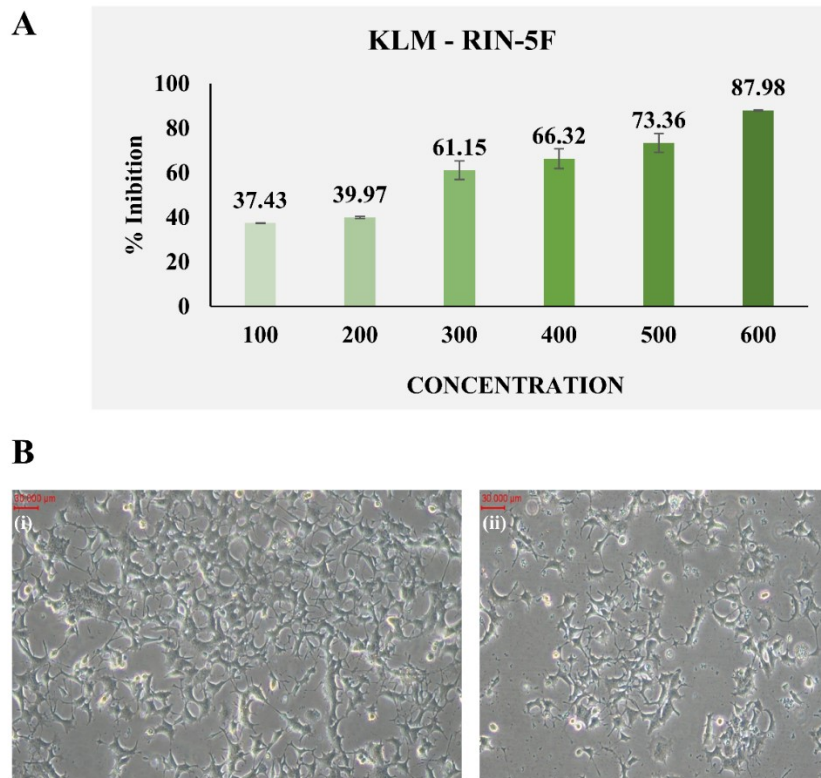

**Fig. S12 (A-C).** **A.** Determination of cytotoxicity of *Kalanchoe laciniata* methanolic extract (KLM) on normal RIN-5F cells (% inhibition of cell growth) by MTT assay. RIN-5F cells were treated with varying concentrations of the KLM extract (100–600  $\mu\text{g}/\text{mL}^{-1}$ ) for 24 hours. Data are presented as mean  $\pm$  standard deviation (SD) of triplicate experiments, with error bars representing variability among replicates. Statistical significance was evaluated using one-way analysis of variance (ANOVA). **B.** Morphological examination of RIN-5F cells following treatment with *Kalanchoe laciniata* methanolic extract (KLM) assess cell proliferation inhibition. (I) untreated cells under optical microscope showing excellent cell density (II) KLM treated cells with a lower cell density exhibit a marked reduction in viable cells.
